1 **The expression of virulence by the *Cryptococcus neoformans* VN1a-5 lineage is plastic and**  
2 **associated with host immune background.**

3

4 Trieu Phan Hai<sup>1</sup>, Thanh Lam Tuan<sup>1</sup>, Duong Van Anh<sup>1</sup>, Trinh Nguyen Mai<sup>1</sup>, Lan Nguyen Phu  
5 Huong<sup>2</sup>, Guy E Thwaites<sup>1,3</sup>, Errin Johnson<sup>4</sup>, Nguyen Van Vinh Chau<sup>2</sup>, Phil Ashton<sup>1,3</sup>, Jeremy  
6 Day<sup>1,3</sup>

7

8 1. Oxford University Clinical Research Unit, Wellcome Trust Asia Africa Programme, 764 Vo  
9 Van Kiet, Quan 5, Ho Chi Minh City, Vietnam

10 2. Hospital for Tropical Diseases, 764 Vo Van Kiet, Ho Chi Minh City, Viet Nam

11 3. Nuffield Department of Clinical Medicine, University of Oxford, Old Road Campus,  
12 Headington, Oxford OX3 7BN UK

13 4. Sir William Dunn School of Pathology, University of Oxford, S Parks Rd, Oxford OX1 3RE,  
14 United Kingdom UK

15

16 **Corresponding author:**

17 J N Day

18 Oxford University CLinical Research Unit

19 764 Vo Van Kiet

20 Quan 5

21 Ho Chi Minh City

22 Vietnam

23 Email:jday@oucru.org

24

25 **Key words:**

26 *Cryptococcus neoformans*; Meningitis; Immunocompetent; HIV; Virulence; Pathogenesis

27

28

## 29 **Abstract**

30 *Cryptococcus neoformans* most frequently causes disease in immunocompetent patients.  
31 However, in Vietnam and east Asia, disease is frequently reported in apparently  
32 immunocompetent patients. We have previously shown that almost all such disease is due  
33 to a specific lineage of *C. neoformans* – VN1a-5. However, in HIV infected patients, infections  
34 due to this lineage are not associated with worse outcomes. Here, we demonstrate that the  
35 VN1a-5 presents different virulence phenotypes depending on its source. Isolates derived  
36 from immunocompetent patients are more virulent than those from HIV infected patients  
37 or the environment. Moreover, the virulence phenotype is plastic – sterile culture filtrate  
38 from highly virulent VN1a-5 strains can induce increased virulence in less virulent VN1a-5  
39 isolates, which in turn can then induce increased virulence in their low virulence states. We  
40 present evidence that this phenomenon is driven by secreted proteins associated with  
41 extra-cellular vesicles.

42

## 43 **Introduction**

44 Cryptococcal meningitis is a devastating disease due to infection with encapsulated yeasts  
45 of the *Cryptococcus* genus. Seven species (*Cryptococcus neoformans*, *C. deneoformans*, *C.*  
46 *gattii*, *C. bacillisporus*, *C. deuterogattii*, *C. tetragattii*, *C. decagattii*) are well recognised to  
47 cause human disease<sup>1</sup>. Disease most frequently occurs in immunosuppressed patients, but  
48 the *Cryptococcus gattii* species complex has been frequently associated with disease in  
49 immunocompetent patients<sup>2</sup>. The *C. gattii* species complex is limited to areas of tropical and  
50 sub-tropical/temperate rainforest<sup>3</sup>.

51 The vast majority of human cryptococcal meningitis occurs in HIV infected patients and is  
52 due to *Cryptococcus neoformans*. There are an estimated 223,000 cases per year resulting in  
53 181, 000 deaths<sup>4</sup>. Disease in HIV infected patients has been driven by the clonal expansion  
54 of a small number of well-defined lineages of *C. neoformans*, and while these are widely  
55 dispersed globally, in most countries a single lineage predominates<sup>5</sup>. Vietnam is unusual in  
56 having two co-dominant lineages circulating– VN1a-5 and VN1a-4 – with each accounting for  
57 about 35-40% of cases of meningitis in HIV infected patients<sup>5-7</sup>.

58 In addition to HIV-associated disease, cryptococcal meningitis is also well-described in HIV  
59 uninfected patients in southeast and east Asia<sup>8-12</sup>. Such patients account for about 20% of  
60 cases at our hospital in Vietnam<sup>12</sup>. The majority of patients are apparently  
61 immunocompetent, with no other evidence to suggest underlying immune deficit.

62 Outcomes are similar to those seen in HIV patients, with 3 month mortality rates in the  
63 order of 20-30%<sup>12</sup>. Contrary to expectation, most infections in these patients (80%) are due  
64 to *C. neoformans*, rather than *C. gattii*<sup>13</sup>. We have previously identified a strong association  
65 between the *C. neoformans* VN1a-5 lineage and disease in these apparently  
66 immunocompetent patients – it accounts for approximately 90% of cases due to *C.*

67 *neoformans*<sup>5,6,13</sup>. Furthermore, HIV uninfected patients with cryptococcal meningitis due to  
68 other lineages are statistically significantly more likely to have co-morbidities associated  
69 with immune compromise<sup>13</sup>. This suggests that isolates of the VN1a-5 lineage have increased  
70 pathogenic potential. Of note, we do not observe clustering of isolates within the VN1a-5  
71 lineage according to host immune phenotype, suggesting that the entire lineage has the  
72 potential to cause disease in immunocompetent people<sup>5</sup>. Despite this apparent increase in  
73 pathogenic potential, in HIV infected patients meningitis due to the VN1a-5 lineage does not  
74 have worse outcomes than that due to other lineages circulating in Vietnam – in other

75 words the lineage does not appear more virulent in HIV infected patients<sup>6</sup>. This could have  
76 one of two explanations. First, the VN1a-5 lineage is more pathogenic than other lineages  
77 and capable of causing disease in immunocompetent people. Alternatively, the lineage may  
78 be exploiting some undefined, VN1a-5 specific, defect in host immunity in HIV uninfected  
79 patients that enables infection and/or subsequent development of disease. Here, we  
80 demonstrate that, using the *Galleria mellonella* model of infection, we can detect  
81 differences in virulence between isolates of the VN1a-5 lineage of different ecological  
82 backgrounds. The most virulent isolates are isolates of the VN1a-5 lineage from HIV  
83 uninfected patients. Sterile culture filtrate from these highly virulent isolates can induce  
84 increased virulence in low virulence isolates of the same lineage from HIV patients or the  
85 environment. Such induced isolates can subsequently upregulate the virulence of other low  
86 virulence isolates, and their own 'naïve' self. This process is lineage specific and mediated  
87 through secreted proteins associated with extracellular vesicles.

88

## 89 Results

90 **1. VN1a-5 isolates from immunocompetent patients are more virulent than VN1a-4**  
91 **clinical isolates, and than VN1a-5 isolates from HIV infected patients or the**  
92 **environment.**

93 We used the *Galleria* model of infection to compare the relative virulence of VN1a-5 isolates  
94 from different sources, and with clinical isolates of the VN1a-4 lineage. Details of the strains  
95 used are given in **Table 1 of the Supplementary Appendix**. First we compared 20 clinical  
96 isolates of VN1a-5 from HIV uninfected patients with 20 isolates of the VN1a-4 lineage from  
97 HIV infected patients. The Kaplan-Meier curves are shown in **Figure 1A**. There was a

98 significantly increased hazard of death in *Galleria* infected with VN1a-5 compared with VN1a-  
99 4 (Hazard Ratio (HR) 1.4, 95% Confidence Interval (95CI) 1.2-1.6,  $P < 0.001$ ). Because we had  
100 previously failed to identify worse survival in Vietnamese HIV infected patients with VN1a-5  
101 infections, we next compared the relative virulence of VN1a-5 isolates according to their  
102 source – i.e whether they were derived from HIV uninfected apparently immunocompetent  
103 patients, HIV infected patients, or the environment. We found divergence of *Galleria*  
104 survival curves by this factor: infection with isolates from immunocompetent patients was  
105 associated with a significantly increased hazard of death compared with infection with  
106 isolates from HIV infected patients (HR 1.7, 95CI 1.3 – 2.4,  $P < 0.001$ ) or with isolates from the  
107 environment (HR 5.7, 95CI 3.9 – 8.4,  $P < 0.001$ , **see figure 1B**). We repeatedly passaged (six-  
108 fold) environmental strains through *Galleria* hypothesising that the difference in virulence  
109 phenotype by ecological background was a function of a previous infection experience.  
110 However, the virulence phenotype of the environmental isolates remained stable over  
111 multiple passages through the *Galleria* model, with no change in the hazard of death  
112 between the infection with the ‘naïve’ environmental isolate versus infection with that  
113 isolate following six-times passage through the model (see **Supplementary Figure 1**).

114

115 **2. VN1a-5 isolates from HIV uninfected patients express greater *in vitro* growth and**  
116 **thinner capsules than VN1a-5 isolates from HIV infected patients**

117 We next compared the expression of *in vitro* phenotypic characteristics associated with  
118 virulence by VN1a-5 isolates depending on their source – i.e. whether they were from  
119 immunocompetent patients or from HIV infected patients. We compared 15 isolates from  
120 apparently immunocompetent patients with 15 isolates derived from HIV infected patients.

121 We tested growth rates at 30 and 37°C in YPD broth and in pooled human CSF, capsule size,  
122 extracellular urease and phospholipase production, and melanin production. Isolates from  
123 from HIV uninfected patients had moderate but statistically increased growth by 48 hours at  
124 30°C and 37°C compared with isolates from HIV infected patients (median  $4.5 \times 10^5$  CFU/ml  
125 (Interqartile Range (IQR)  $3.6 \times 10^5$  -  $5.2 \times 10^5$ ) and  $4 \times 10^5$  CFU/ml (IQR  $2.6 \times 10^5$  -  $5 \times 10^5$ ) for  
126 immunocompetent isolates versus  $3.3 \times 10^5$  CFU/ml ( $2.9 \times 10^5$  -  $4.5 \times 10^5$ ) and  $2.8 \times 10^5$   
127 CFU/ml ( $2.2 \times 10^5$  -  $3.8 \times 10^5$ ) for HIV derived isolates,  $P=0.004$  and  $0.002$  respectively). There  
128 was no statistically significant difference in the ability of immunocompetent patient derived  
129 isolates to grow at 37°C ( $P=0.058$ ) compared with 30°C; however, isolates from HIV infected  
130 patients appeared to have decreased growth at 37°C ( $P = 0.044$ ). (see **Figure 2A**).

131 In contrast, isolates derived from immunocompetent patients appeared to have slower  
132 growth in *ex vivo* CSF compared with isolates derived from HIV infected patients, with  
133 median fungal burdens after 48 hours of  $7 \times 10^3$  CFU/ml (IQR  $4.9 \times 10^3$  -  $1.0 \times 10^4$ ) versus  
134  $1.9 \times 10^4$  (IQR  $6 \times 10^3$  -  $2.6 \times 10^4$ ),  $P=0.02$  (**Figure 2B**). They also expressed significantly thinner  
135 capsules (median thickness 1.3 microns, IQR 0.8 - 1.6) compared with isolates from HIV  
136 infected patients (median 1.5 microns, IQR 1.3 – 1.95),  $P<0.001$ , see **Figure 2D**. There was  
137 no difference in yeast cell diameter (median 3.45 micron vs 3.3 micron,  $P = 0.5$ ,  
138 immunocompetent derived versus HIV derived isolates). All strains produced melanised  
139 colonies on L-DOPA agar and were urease positive. There was no difference in  
140 phospholipase production (data not shown).

141

142       **3. Growth in sterile culture filtrate from VNla-5 isolates from HIV uninfected patients,**  
143               **but not from HIV patients, induces increased virulence in HIV-associated and**  
144               **environmental VNla-5 isolates of *C. neoformans***

145 We hypothesised that the increased virulence in *Galleria* seen in isolates derived from HIV  
146 uninfected patients is associated with their ability to cause disease in immunocompetent  
147 people. Isolates from HIV uninfected patients are distributed throughout the VNla-5 lineage;  
148 presumably all isolates of the lineage should be capable of being in this state, and able to  
149 cause disease in immunocompetent hosts. We hypothesized that the development and/or  
150 maintenance of an increased virulence state is driven by inter-yeast communication. To test  
151 this we grew a low virulence environmental VNla-5 isolate in culture medium supplemented  
152 with sterile culture filtrate from high virulence VNla-5 isolates from immunocompetent  
153 patients, and then compared the virulence phenotypes of the isolates in *Galleria*. Growth in  
154 media supplemented with sterile culture filtrate from all 4 strains from immunocompetent  
155 patients resulted in increases in the virulence of the environmental isolates compared with  
156 its 'naïve' self, with the hazard of death with infection of the induced isolate increasing  
157 between 2.2 and 2.5 fold (**see Figure 3**). The change in virulence phenotype of the  
158 environmental isolates was stable over multiple generations and *Galleria* infection cycles  
159 (**see Supplementary Figure 2**).

160 In contrast, growth in media supplemented with pooled sterile culture filtrate from HIV-  
161 associated VNla-5 isolates had no effect on the virulence phenotype of environmental  
162 isolates, **see Figure 4A** (HR1.4, 95CI 0.8-2.3, P=0.2, 'induced' isolate versus naïve isolate).

163 We next repeated the experiments but growing the environmental VNla-5 isolate in  
164 medium supplemented with sterile culture filtrate from VNla-4 isolates (necessarily derived

165 from HIV infected patients). This did not result in any significant change in the virulence of  
166 the environmental isolate (see **Figure 4B**). Similarly, growth in sterile culture filtrate derived  
167 from the *C. neoformans* H99 type-strain had no effect on virulence phenotype (see **Figure**  
168 **4C**). Growing the VN1a-5 environmental isolate in medium supplemented with its own  
169 sterile culture filtrate from previous culture had no effect on virulence phenotype **Figure 4D**.

170

#### 171 **4. Culture filtrate from an induced VN1a-5 isolate will itself induce increased virulence** 172 **in its naïve isogenic self**

173 We then tested the effect of growing a ‘naïve’ low virulence VN1a-5 environmental isolate  
174 (LD2) in media supplemented with sterile culture filtrate from its previously ‘induced’ higher  
175 virulence self. First, we cultured the naïve LD2 isolate in culture medium supplemented with  
176 sterile culture filtrate from the highly virulent, immunocompetent derived isolate BMD761  
177 for 48 hours. We harvested the cultured yeast cells by centrifugation and washing and  
178 purified them for single colony growth on solid agar. We termed this isolated ‘iLD2’. We  
179 recultured iLD2 in liquid medium for 48 hours and harvested culture filtrate. We then  
180 recultured the naïve LD2 strain in medium supplemented with the sterile culture filtrate  
181 from iLD2 for 48 hours. We termed the resulting isolate ‘iLD2-induced LD2’ . We then  
182 compared the virulence phenotypes of the isolates from each experiment in the *Galleria*  
183 model – i.e. ‘LD2’, ‘iLD2’, ‘iLD2-induced LD2’ and BMD761. (see **figure 5**). We found that, like  
184 the sterile culture filtrate from BMD761, the sterile culture filtrate of iLD2 was itself able to  
185 induce an increased state of virulence in its naïve self (nLD2).

186



187       **5. Virulence induction is associated with increased *ex vivo* CSF survival, higher fungal**  
188               **burdens in *Galleria*, and reduced capsule size.**

189       We assessed the effect of culture filtrate induction on virulence-associated phenotypes  
190       (thermotolerance, melanin formation, *ex vivo* CSF survival, fungal burden in *Galleria* and  
191       capsule size *ex-Galleria*) by comparing the environmental LD2 before (naïve) and after its  
192       induction (induced). There were no changes in thermotolerance (ability to grow *in vitro* at  
193       30°C or 37°C) or in apparent melanization. However, the induced LD2 had superior growth  
194       in *ex vivo* CSF compared with its naïve self, with higher fungal burdens after 48 hours  
195       incubation (median  $5.9 \times 10^4$  CFU/ml, IQR  $3.6 \times 10^4 - 7.6 \times 10^4$  vs  $3.5 \times 10^4$  CFU/ml, IQR  $2.3 -$   
196        $5.7 \times 10^4$ ,  $P = 0.02$ , see **Supplementary Figure 3a**). Similarly, the 48 hour fungal burden in  
197       *Galleria* hemolymph infected with the induced isolate was significantly higher than that of  
198       its naïve self (median fungal burden  $9.6 \times 10^6$  CFU/g body weight (inter-quartile range  $6.9$   
199        $\times 10^6 - 1.4 \times 10^7$ ) versus  $5.3 \times 10^6$  CFU/g body weight (IQR  $4.0 \times 10^6 - 6.7 \times 10^6$ ,  $P = 0.025$ ), see  
200       **Supplementary Figure 3b**). However, induced LD2 isolates expressed significantly thinner  
201       capsules compared with the naïve self both when grown *in vitro* (median capsule width  $4.5$   
202        $\mu\text{m}$ , IQR  $3.3 - 6.4$  versus  $7.2 \mu\text{m}$ , IQR  $4.5 - 9.8$ ,  $P < 0.001$ , induced versus naïve respectively) or  
203       when recovered from larval hemolymph ( $P = 0.03$ , see **Supplementary Figure 4**). Both  
204       induced LD2 and naïve LD2 had significantly thinner capsules than the highly virulent  
205       immunocompetent associated strain BMD761 ( $P < 0.001$  and  $P = 0.03$  respectively).

206

207       **6. The inducing effect of sterile culture filtrate is abolished by boiling and protease,**  
208               **but not freezing or nuclease treatment.**

209 We froze sterile culture filtrate from the hypervirulent strain BMD761 at -20°C for 1 month.  
210 Upon thawing, its induction effect on the naïve environmental strain LD2 was maintained  
211 (**Figure 6A**). However, boiling sterile culture filtrate was associated with loss of induction  
212 effect (**Figure 6B**), as was treatment with Proteinase K (**Figure 6C**). However, incubation of  
213 sterile culture filtrate with RNase or DNase had no effect, and the induction property was  
214 conserved (**Figure 6D**).

215

## 216 **7. The induction phenomenon is likely mediated via extracellular vesicles.**

217 Extracellular vesicles (EVs) have been implicated in the pathogenic potential of *Cryptococcus*  
218 *neoformans* and the related organism *Cryptococcus gattii*. To gather circumstantial evidence  
219 to support this hypothesis, we added albumin, which disrupts EV function, to sterile culture  
220 filtrate and tested the effect on induction<sup>14</sup>. Adding bovine serum albumin to sterile culture  
221 filtrate resulted in a loss of the induction effect (see **Supplementary Figure 5**). We then used  
222 an ultracentrifugation-based extra-cellular vesicle separation protocol to produce an EV-free  
223 supernatant and EV-containing pellet fractions from sterile culture filtrate. Incubation of  
224 naïve LD2 in media supplemented with supernatant did not result in induction of increased  
225 virulence (see **Figure 7B and D**); conversely when we incubated naïve LD2 in media  
226 supplemented with the putatively EV containing pellet there was induction of increased  
227 virulence (see **Figure 7A and C**). Subsequent electron microscopy of ultracentrifugation  
228 pellets confirmed presence of EVs; EVs were not seen supernatant (**Figure 8**).

229

230

231       **8. Induction is associated with increased expression of recognised virulence factor**  
232               **genes and increased expression of a number of hypothetical proteins**

233 We next used RNA-seq to probe the transcriptional basis of the observed change in  
234 phenotype. RNA was extracted for six biological replicates and sequenced on an Illumina  
235 HiSeq 4000 for four samples; an environmental VNla-5 (low virulence and termed naïve LD2  
236 (nLD2)), a clinical VNla-5 from an HIV uninfected patient (BMD761), environmental VNla-5 in  
237 a state of increased virulence consequent to having been grown in media supplemented  
238 with sterile culture filtrate from clinical VNla-5 (induced LD2: iLD2) and the naïve  
239 environmental VNla-5 isolate (nLD2) grown in media supplemented with its own sterile  
240 culture filtrate from a previous culture of itself (self-induced LD2: siLD2). Between 6.4 and  
241 12.2 million reads were mapped per replicate, and more than 97% of reads mapped to the  
242 H99 reference genome in each replicate (full details in **Supplementary Table 2**). The  
243 virulence phenotypes of the isolates from all experiments, along with the inducing/non-  
244 inducing effect of their associated sCFs were confirmed in all cases - i.e. that the isolates had  
245 the expected virulence in *Galleria*, and that their associated culture filtrate was inducing  
246 (BMD761, iLD2 and siLD2) or non-inducing (nLD2). We confirmed strain identities by  
247 identifying SNPs unique to each isolate from corresponding whole genome sequencing data,  
248 and checking for the presence of these SNPs in the RNA-seq data.

249 To get an overall representation of the similarity of the transcriptomes of the four samples,  
250 we performed a PCA analysis on read counts per gene (see **Supplementary Figure 6**). The  
251 majority of replicates clustered by their sample type. There were some outliers, three of the  
252 BMD761 replicates did not group with the primary cluster of three similar samples, although  
253 two of these replicates were more distant from the primary cluster in the second dimension

254 of the PCA, which only explained 18% of the variance. Two replicates of LD2 and one  
255 replicate of induced LD2 were also separated from the primary clusters of their sample  
256 types. Despite these outliers, a clear pattern can be discerned, with a different overall  
257 pattern of gene expression between BMD761 and nLD2. The overall transcriptional profile  
258 of iLD2 shifted much closer to BMD761. In order to check for effects of the presence of  
259 culture filtrate, as opposed to culture filtrate from a high virulence biotype, we also  
260 supplemented the culture media of naïve LD2 with culture filtrate of a previous batch of  
261 naïve LD2; this self-induced LD2 also differed in its transcriptional profile from the naïve  
262 LD2, but in a distinct way from the iLD2, and did not converge with the expression profile of  
263 BMD761.

264 Next, we performed a differential gene expression analysis in order to identify genes that  
265 were significantly (Wald test, Benjamini-Hochberg adjusted P value  $<0.05$ , log<sub>2</sub> fold change  
266  $\geq 1$  and  $\leq -1$ ) up and down regulated. We found that there were 784 differentially expressed  
267 genes between BMD761 and naïve LD2, but after induction, there were only 244  
268 differentially expressed genes between BMD761 and induced-LD2 (Figure 9). This contrasts  
269 with the large number of differences between these 2 isolates and LD2 in the other states  
270 (naïve or self-induced), where we found there were  $>1500$  DEGs (Figure 9). This pattern of  
271 similarity between BMD761 and induced-LD2 and difference between the aforementioned  
272 and naïve or self-induced LD2 was maintained, even when the outliers were included  
273 **(Supplementary Figure 7).**

274 We mined the genes which were upregulated in both BMD761 and induced LD2 compared  
275 with naïve LD2 for functional associations which could explain this phenotypic difference.  
276 We focussed on genes which have an experimentally validated link to virulence<sup>15</sup>, finding

277 that there were 17 up-regulated virulence factors in both BMD761 and Induced LD2 relative  
278 to naïve LD2 [Supplementary Table 3].

279

## 280 **9. Metagenomics**

281 One potential cause of the induction phenomenon could be horizontal gene transfer such as  
282 infection due to a mycovirus. We used Taxonomer, a metagenomics-based pathogen  
283 detection tool (<http://taxonomer.com>) to interrogate all unmapped DNA (from whole  
284 genome sequencing) and RNA (from RNAseq) unique to BMD761 and induced LD2,  
285 compared with naive LD2 and self induced LD2, in order to identify DNA or RNA signatures  
286 suggestive of a mycovirus infection associated with induction. We did not find any  
287 convincing evidence to support the mycovirus hypothesis – we found a small number of  
288 reads consistent with DNA viruses; however, none were expressed in every replicate and  
289 the read counts were low.

290

## 291 **Discussion**

292 A number of lineages of *Cryptococcus neoformans* cause meningitis in humans in Vietnam,  
293 but the vast majority of cases are due to either VN1a-4 or VN1a-5<sup>5</sup>. We have previously  
294 shown that the VN1a-5 lineage is strongly associated with disease in apparently  
295 immunocompetent patients<sup>5,6</sup>. Both VN1a-5 and VN1a-4 frequently affect our (severely  
296 immunosuppressed) HIV infected patients<sup>5,6</sup>. VN1a-4 rarely causes disease in HIV uninfected  
297 patients, and when it does, the patients are significantly more likely to have underlying  
298 diseases associated with immunosuppression. Despite this difference in ability to infect

299 hosts of different immune competencies, mortality rates are no different in HIV infected  
300 patients whether they are infected with VN1a-4 or VN1a-5<sup>6</sup>.

301 Here, we have found that the VN1a-5 lineage displays significant variability in virulence  
302 phenotype in the *Galleria* model of infection, and that this is associated with the particular  
303 isolate's ecological background – isolates from immunocompetent patients are more  
304 virulent than those from HIV-infected individuals or those recovered from the environment.

305 The VN1a-5 isolates derived from immunocompetent patients are also significantly more  
306 virulent than VN1a-4 isolates, necessarily derived from HIV infected patients.

307 The differences in virulence phenotype of the VN1a-5 isolates are not explained by a specific  
308 within-lineage substructure - virulent isolates from immunocompetent patients do not  
309 cluster within, but are distributed throughout, the VN1a-5 phylogeny<sup>5</sup>. This suggests that any  
310 isolate of the VN1a-5 lineage should have the capacity to express a highly virulent  
311 phenotype, and therefore infect immunocompetent patients. Consistent with this, we found  
312 that the VN1a-5 virulence phenotype is highly plastic – less virulent isolates, derived from  
313 the environment, can be induced into a more virulent state by growing them in culture  
314 media that has been supplemented with sterile culture filtrate from highly virulent isolates,  
315 derived from immunocompetent patients. While we found HIV derived VN1a-5 isolates were  
316 somewhat more virulent than the environment-derived isolates, their sterile culture filtrate  
317 lacked this capacity and could not induce increased virulence. The induction effect was also  
318 limited to sterile culture filtrate derived from the VN1a-5 lineage – sterile culture filtrate  
319 from the VN1a-4 lineage, or from the VN1b H99 type strain, did not have the induction  
320 property. Therefore, we hypothesize that the induction effect seen with culture filtrate from  
321 immunocompetent patient-derived VN1a-5, and the virulence plasticity of the lineage, are

322 intimately associated with the ability of the lineage to cause disease in the  
323 immunocompetent host.

324 We found the increased virulence of VN1a-5 derived from immunocompetent patients was  
325 associated with differences in *in vitro* virulence phenotypes compared with isolates from  
326 HIV-infected patients, although the relationship was not simple. Isolates from  
327 immunocompetent patients had faster rates of growth at 30 and 37°C, but had slower  
328 growth in *ex vivo* cerebrospinal fluid and expressed thinner capsules. Induction of the higher  
329 virulence state in the environmental isolate LD2 was also associated with increased fungal  
330 burdens in *Galleria*, and expression of thinner capsules. However, the induced LD2 isolate  
331 grew more rapidly in *ex vivo* CSF compared with its naïve self. It is not clear why the changes  
332 in *in vitro* phenotypes on induction were not entirely consistent with our findings when  
333 comparing isolates by source. It may reflect the fact that these measures of virulence are  
334 largely validated in relation to the ability of a strain to cause disease in humans irrespective  
335 of immune background, i.e. including those with HIV infection. Or, it may be that the  
336 induction phenomenon we have identified here is only a part of the mechanism that is  
337 associated with disease in immunocompetent humans. However, our transcriptional data  
338 suggest that the change in virulence we are measuring in *Galleria* is real, because i) it is  
339 associated with increased expression of a number of virulence associated genes and ii) we  
340 saw a significant and remarkable convergence in gene expression between the highly  
341 virulence BMD761 isolate and the induced environmental isolate LD2.

342 The induction phenomenon we see is robust and repeatable. We do not believe it is an  
343 artefact of ‘carry-over’ of virulent organism from the sCF donor isolate, because we used  
344 0.45 micron filters, which should exclude any donor cells, and every culture filtrate is tested  
345 for sterility through culture. Furthermore, the induced state is stable following purification

346 by culture on solid media. We can be certain that the convergence of the transcriptomic  
347 data from BMD761 and iLD2 is not confounded by contamination because we identified  
348 SNPs unique to each isolate within the context of nearly 900 *C. neoformans* genomes<sup>5</sup>, and  
349 verified the identity of the strains in the RNA-seq data using these markers. Similarly we also  
350 do not believe that the effect on virulence in *Galleria* is due to ‘carryover’ of some agent (eg  
351 extra-cellular vesicles) from the donor isolate sCF, because induced isolates retain their  
352 increased virulence following purification on solid media.

353 The induction effect appears to include a protein component, since the inducing effect of  
354 sCF is lost with both boiling and protease treatment. Our data also suggest that the effect is  
355 associated with extra-cellular vesicles – the addition of albumin, which disrupts  
356 *Cryptococcus* vesicles, to sCF inhibited virulence induction<sup>16</sup>. We used an ultracentrifugation  
357 protocol<sup>14</sup> to concentrate EVs and showed that the induction effect was maintained in the  
358 EV containing pellet, and lost in the EV-free supernatant. We confirmed the  
359 presence/absence of EVs in the pellet/supernatant with transmission electron microscopy.  
360 The populations and compositions of EVs secreted by eukaryotic cells are complex. In  
361 addition to proteins they can contain small nucleic acids<sup>14</sup>. While we found no effect of  
362 nuclease treatment on the property of sCF, it is possible that we may have missed an effect  
363 because any small nucleic acids may have been protected within vesicles.

364 A striking feature of the induction effect is the stability of the resulting phenotype, and the  
365 transmissibility of the phenomenon. One possible explanation is that the effect we are  
366 observing is an infection event by a mycovirus. To investigate this possibility we  
367 interrogated any unmapped reads from our whole genome and transcriptome sequence  
368 data using a metagenomic platform. We found no convincing evidence of viral infection. A  
369 further possibility is that the effect is prion mediated – an EV-associated prion (Sup35p) has



370 been implicated in cell-to-cell communication in *Saccharomyces cerevisiae*, although the  
371 effect is not well-conserved across species<sup>17,18</sup>. However, the effect we observed of sCF in  
372 our isolates was heat labile, suggesting a prion-driven mechanism is unlikely.

373 On balance, we believe the phenomenon we have described is most likely mediated through  
374 extra-cellular vesicles associated with one or more proteins. Small nucleic acids may be  
375 involved. Such an EV-dependent mechanism is plausible - their production has been  
376 demonstrated for a number of fungal pathogens, including *Cryptococcus*<sup>19-23</sup>. A specific role  
377 in the pathogenicity of *C.neoformans* was first postulated in 2008<sup>22</sup> - EVs have been shown  
378 to contain virulence-associated factors including capsular components and laccase<sup>20</sup>. In  
379 addition to proteins, EVs are also associated with small DNAs and RNAs which could  
380 influence virulence<sup>14,23-25</sup>. Recently, EVs have been shown to mediate virulence of an  
381 outbreak strain of the related species *C.gattii*<sup>14</sup>. The EV-mediated effect was dose-  
382 dependent, manifested as increased growth, and required both EV-associated protein and  
383 RNA, providing strong evidence of EV uptake enabling inter-yeast communication. The  
384 phenomenon differed from our observations in that it was seen in macrophage culture, and  
385 onward transmissibility of the phenotype was not reported.

386 Such inter-yeast signalling systems, associated specifically with changes in virulence, are  
387 exciting potential therapeutic targets. A great challenge in treating HIV uninfected patients  
388 with cryptococcal meningitis, is knowing when it is safe to stop antifungal therapy, and in  
389 fact complete cure may take many months of treatment, or even life-long antifungal  
390 therapy. This contrasts with HIV infected patients, where there is a modifiable immune  
391 pathology, and once antiretroviral therapy has allowed immune recovery, as evidenced by  
392 peripheral blood CD4 counts, we know it is safe to stop antifungal treatment for most

393 patients. Disrupting inter-yeast signalling associated with control of virulence, alongside  
394 conventional treatment, might ultimately allow cure in immunocompetent patients.  
395 Where and when the induction phenomenon occurs in relation to human disease is unclear.  
396 It may be a rare event that occurs somewhere in the environment, perhaps as a result of  
397 interaction with other micro-organisms, or due to animal infection, or it might occur in  
398 humans themselves<sup>26-29</sup>. If the former, then we would on occasion expect to see such  
399 inducing isolates in HIV infected patients. We would need to characterise large numbers of  
400 isolates from HIV infected patients to explore this. While there are significant numbers of  
401 people living with HIV in southeast and east Asia, the HIV prevalence is relatively low. In  
402 Vietnam, it is estimated to be <1%<sup>30</sup>. Therefore, if the induction of virulence in VNIa-5  
403 isolates occurs in the environment and is a rare event, we would indeed expect to see the  
404 majority of cases in immunocompetent patients rather than HIV patients, since  
405 immunocompetent patients so outnumber those with HIV infection.

406

#### 407 **Conclusion**

408 The virulence phenotype of *Cryptococcus neoformans* VNIa-5 in the *Galleria* infection model  
409 is associated with the isolate source. Isolates from immunocompetent patients are the most  
410 virulent; those from the environment the least. Since highly virulent isolates do not cluster  
411 within the lineage, it is likely that all isolates have the capacity to cause disease in the  
412 immunocompetent, and indeed we found the virulence phenotype to be highly plastic.  
413 Regulation of virulence in part appears to be influenced by inter-yeast signalling through the  
414 secretion of proteins which our data suggest are associated with extracellular vesicles. The  
415 change in phenotype from 'naïve' to 'induced' is accompanied by transcriptional re-  
416 modelling and converged of the induced isolate with the 'inducer'. Once an isolate of the

417 lineage has had its virulence induced, it can turn induce increased virulence in other VNla-5  
418 isolates. The induction phenomenon is VNla-5 specific, and presumably is key in the lineages  
419 ability to cause disease in the immunocompetent. Better understanding the mechanism  
420 may reveal novel therapeutic targets.

421

## 422 **Funding**

423 Funded by a Wellcome Trust Intermediate Fellowship to JND Grant number: WT097147MA

424

## 425 **Methods**

### 426 **Isolates**

427 Clinical isolates were derived from Vietnamese patients with cryptococcal meningitis who  
428 had been enrolled into descriptive and randomised intervention studies performed by our  
429 institute in collaboration with the Hospital for Tropical Diseases, Ho Chi Minh City<sup>12,31,32</sup>. All  
430 isolates were from cerebrospinal fluid obtained at the point of diagnosis and/or study entry,  
431 and stored on Microbank beads at -80°C prior to revival on Sabouraud dextrose agar.

432 Informed consent was obtained from all participants; all studies received ethical approval  
433 through the Oxford Tropical Ethics Committee, The Hospital for Tropical Diseases, and The  
434 Ministry of Health of Vietnam. All isolates have been previously sequenced and the data are  
435 publically available<sup>5</sup>. Isolates of the lineage and human immune phenotype of interest (HIV  
436 infected or not) were randomly selected from the isolate database for subsequent  
437 experiments. Environmental isolates were obtained via randomised sampling of air, soil and  
438 tree bark in urban and rural areas within and around Ho Chi Minh City. All strains used were  
439 mating type alpha.

440

441 ***In vitro* phenotyping**

442 **Temperature – dependent growth**

443 Growth at high temperature and in *ex vivo* human CSF were tested as previously described  
444 with modifications for quantitative assessment<sup>33</sup>. *Cryptococcus spp* were cultured on  
445 Sabouraud agar for 2 days at 30°C. Inocula were made from single colonies and adjusted to  
446 10<sup>8</sup> cells/ml, then serially 10-fold diluted and spotted in duplicate onto YPD agar in 5µl  
447 aliquots. Incubation was at 30°C or 37°C for 48 hours. After 48 hours, the number of colony  
448 forming units (CFU) was counted and expressed as CFU/ml.

449

450 **Capsule production**

451 Capsule thickness was assessed through growth on Dulbecco Modified Eagle Medium  
452 (DMEM) [supplemented with 4.5g/L glucose, L-glutamine, sodium pyruvate], NaHCO<sub>3</sub>  
453 250mM, NaMOPS 1M, Neomycin 200mg/ml, Cefotaxime 100 mg/ml<sup>34</sup>. Plates were  
454 incubated at 37°C in 5 % CO<sub>2</sub> for 5 days. A suspension from a single colony was made in  
455 India ink visualized at 100X magnification using light microscopy (CX41, Olympus, Japan).  
456 Images were captured using a built-in DP71 camera (Olympus, Japan) and visualised using  
457 ImageJ (<https://imagej.nih.gov/ij/index.html>). Capsular thickness was calculated by  
458 subtracting yeast cell body diameter from the whole cell diameter. At least 30 individual  
459 microscopic yeast cells were assessed for each isolate.

460

461

## 462 **Melanization**

463 Melanin production was assessed by plating 5µl of 10<sup>6</sup>cells/mL cell suspension onto L-DOPA  
464 agar containing 1g/L L-asparagine , 1g/L glucose, 3g/L KH<sub>2</sub>PO<sub>4</sub>, 250mg/L MgSO<sub>4</sub>.7H<sub>2</sub>O,  
465 1mg/L Thiamine HCl, 5µg/L Biotin, 100mg/L L-DOPA, 20g/L Bacto Agar (Fisher Scientific,  
466 UK)<sup>35,36</sup>. Plates were incubated in the dark at 30°C. Differences in colony melanization were  
467 compared visually with reference to H99 and an H99-derived mutant with diminished  
468 melanization in L-DOPA agar, kindly provided by the Perfect Lab, Duke University .

469

## 470 **Urease and phospholipase production**

471 Urease production was confirmed by spotting 5µl of 10<sup>8</sup>cells/mL cell suspension onto  
472 Christensen's agar with incubation at 30°C for 72 hours. *Cryptococcus neoformans* H99 type  
473 strain and *Candida parapsilosis* ATCC 22019 were used as positive and negative controls.  
474 Cultures were observed for the characteristic pink discoloration.

475 Extracellular phospholipase activity was confirmed on egg yolk medium as previously  
476 described, with minor modifications again using a 5 µl aliquot of *C. neoformans* yeast  
477 suspension (10<sup>8</sup> cells/ml) with incubation at 30°C for 72 hours<sup>37</sup>. The diameter of the  
478 precipitation zone (D) formed around a colony in relation to the diameter of the respective  
479 colony itself (d) was recorded for 5 selected colonies of each isolate (N=450 total) collected  
480 after 72 hours incubation. The D/d ratio for each isolate was calculated. H99 was included  
481 for reference in each experimental batch. The final result for each isolate was expressed as  
482 the ratio D/d ratio. Type strain H99 was used as a quality control.

483

#### 484 **Survival in *ex vivo* cerebrospinal fluid**

485 CSF was prepared by pooling and filtering (Millipore 0.45 micron membranes, Merck ) CSF  
486 samples taken prior to antifungal therapy from HIV infected patients participating in clinical  
487 trials. CSf was stored at -80°C prior to use. An inoculum of  $10^7$  cells/mL of each isolate of  
488 interest was prepared using a Cellometer X2 (Nexcelom) cell counter. 10 uL of inoculum was  
489 added to 90 uL of CSF and PBS followed by incubation at 30°C for 3 days. After 72 hours the  
490 resulting culture was serially tenfold diluted, spotted onto Sabouraud plates and incubated  
491 at 30°C for 3 days for quantification. Tested trains were inoculated alongside H99 and the  
492  $\Delta$ ENA1 negative control (which lacks a cation-ATPase-transporter resulting in decreased  
493 viability in human CSF and macrophages, strain provided by the Perfect Lab, Duke  
494 University)<sup>33</sup>. Two biological replicates were performed per isolate.

495

#### 496 ***Galleria* infection model**

497 Late instar isogenic wild type *Galleria mellonella* larvae (30 days from oviposition of the  
498 adult moth) were sourced from U U Animal, (Ho Chi Minh city, Vietnam). All larvae were  
499 kept at 16°C in bran in the dark. Larvae for experimentation were selected according to the  
500 following criteria: weight 250-300 mg, healthy colour (beige). Yeasts were revived from  
501 frozen stock (Microbank Beads) on SDA plates for 72 hours. Single colonies were picked and  
502 cultured in YPD broth for 24 to 48 hours in a shaking incubator (SI-300, Jeio Tech), at 150  
503 rpm at 30°C until the concentration of cells was as at least  $10^8$  cells/mL. The pellet was  
504 collected with centrifuge at 8000 rpm in 1 minute and subsequently washed twice with PBS.  
505 The cell suspension was adjusted to a density of  $10^8$  cells/mL using a Cellometer X2  
506 (Nexcelom Bioscience, USA). Ten  $\mu$ L of inoculum ( $10^6$  cells/larva) were used for injection per

507 larva. All inocula were relabeled by an independent person such that the operator/assessor  
508 was blind to the nature of the inoculum used in each batch of larvae (i.e. the survival  
509 experiments were blinded). Larvae were inoculated through injection using a sterile  
510 Hamilton syringe into the most caudal left pro-leg. 15-20 larvae were infected per  
511 cryptococcal isolate. Each cryptococcal strain was injected into 15 or 20 larvae. Every  
512 survival experiment was internally contemporaneously controlled using larvae of the same  
513 batch, a negative control (PBS) (physical injury and sterility), and uninjected larvae and the 2  
514 or more experimental arms of interest. Infected larvae were incubated at 37°C for ten days  
515 and checked daily for mortality using physical stimulation with forceps.

516

#### 517 **Culture Filtrate preparation**

518 All isolates were grown in 7.5 ml YPD broth at 30°C with shaking for 48 hours followed by  
519 centrifugation at 8000 rpm for 1 minute. The resulting supernatant was filtered using a  
520 Millipore membrane filter 0.45  $\mu$ m (Merck), and checked for sterility by plating onto  
521 Sabouraud's agar and into BHI broth with incubation at 30°C for seven days.

522

#### 523 **Induction experiments**

524 2.5 mls of the culture filtrate of interest was added to 5mls of sterile YPD broth (total  
525 volume 7.5mls). A single purified colony of the isolate of interest was added to the resulting  
526 culture medium and incubated for 48 hours with shaking at 30°C. Cells were separated by  
527 centrifugation (1 minute at 8000 rpm), washed twice with PBS and pellet spread on  
528 Sabouraud agar plate for single colony purification. Single colony was then inoculated into  
529 YPD broth, and incubated with shaking for 48 hours for inoculum preparation.

530

531 **Confirmation of virulence phenotype stability in *Galleria***

532 Yeast was recovered from *Galleria* hemolymph, cultured for purity on SDA, recultured in  
533 YPD and reinoculated into *Galleria* as described 6 fold. Similarly purified culture derived  
534 from hemolymph was repeatedly subcultured on solid media, frozen on Microbank beads,  
535 revived, and re-inoculated into the *Galleria* model.

536

537 **Quantification of fungal burden in larvae**

538 Larvae infected with the strains of interest (5 dead larvae/biological replicate) were  
539 collected at the point of death and gently squeezed to obtain 1 gram of hemolymph and fat  
540 body using a sterile knife. Glass beads (3mm) and 1 mL of sterile water were added for  
541 homogenization at 30Hz for 10 minutes (TissueLyser II, Qiagen). Homogenates were diluted  
542 with PBS and inoculated onto SAB plates and incubated for 3 days at 30oC. The number of  
543 colonies were counted to calculate the CFU/gram/larvae.

544

545 **Capsule size measurement from *Galleria***

546 Following infection with  $10^6$  cells, larvae were sacrificed 48 hours post-infection and  
547 hemolymph extracted as above. Hemolymph was stained with India ink to visualise capsule  
548 using light microscopy (at 1000X magnification) using an Olympus DP71 digital camera  
549 (Olympus, Japan) and the proprietary Image-J software.

550

551



## 552 **Treatment of culture filtrate with freezing, heat, protease, and nuclease**

553 To check the stability of culture filtrate exposed to prolonged frozen storage, the culture  
554 filtrate of BMD761 was kept at -20 °C for 33 days. The filtrate was brought to room  
555 temperature prior to induction experiments. To denature protein by heat, filtrate of  
556 BMD761 was boiled at 97 °C for 2 minutes. To denature protein chemically, filtrate was  
557 incubated with Proteinase K (Sigma-Aldrich, UK) at a concentration of 100 µg/mL in the  
558 presence of 30 mM Tris.HCl (pH=8) and 5 mM CaCl<sub>2</sub> at 37 °C for 1.5 hours. To degrade DNA,  
559 28 µL DNase I (Ambion, ThermoFisher, UK) was added to 700 µL DNase I buffer and 7 mL  
560 filtrate for 1 hour at 37°C. To remove RNA, 2.5 mL filtrate was incubated with 50 µL RNase  
561 cocktail of RNase A and RNase T1 (Ambion, ThermoFisher Scientific,UK) for 1 hour at 37°C.

562

## 563 **Confirmation of digestion of protein and nucleic acid in filtrate**

564 Protein digestion was confirmed by running treated and untreated culture filtrate on  
565 precast polyacrylamide gel 4-20 % (Mini-PROTEAN® TGX Stain-Free™ Precast Gels, BIO-RAD)  
566 at 200V for 40 mins. Precision Plus Protein Dual Xtra Standards (BIO-RAD) were loaded  
567 alongside samples, including a proteinase K treated ladder.

568 Samples treated with nuclease were confirmed by loading in agarose gel 1.5 % followed by  
569 electrophoresis for 60 mins at 100V, with 100bp DNA ladder.

570

## 571 **Extracellular vesicle preparation**

572 Isolates for experimentation were grown to stationary phase in 500ml of YPD broth at 37°C  
573 with shaking for 48 hours prior to transfer to 200mL centrifugation vessels. These were spun

574 at 15,000g for 10 minutes at 4°C. Supernatant was decanted and centrifugation repeated for  
575 a further 10 minutes, then filtered through 0.45um filter membranes. The filtrate was then  
576 concentrated using Amicon 100kDa ultrafiltration columns with centrifugation at 5000g for  
577 15 minutes at 4°C. The EV containing retentate, was then ultracentrifuged at 150,000g at  
578 4°C for 1 hour to provide EV containing pellet and EV-free supernatant.

579

### 580 **Electron Microscopy**

581 Pellet and supernatant resulting from ultracentrifugation were fixed in 2%  
582 Paraformaldehyde (PFA) in 0.1M sodium Phosphate buffer at room temperature for 30  
583 minutes. Samples were transferred to the Electron Microscopy Facility at the Sir William  
584 Dunn School of Pathology, University of Oxford, UK for Transmission Electron Microscopy.

585

### 586 **Preparation of inducing broth using ultracentrifugation product**

587 Inducing broth consisted of 50uL ultracentrifuged product (either pellet or supernatant  
588 fraction) added to fresh sterile YPD to achieve a final volume of 7.5 mL. A 100uL volume was  
589 taken for culture as a test of sterility. Naive strains (a single colony each) were then  
590 inoculated into inducing broth and incubated for 48 hours with shaking at 30°C. Yeast were  
591 harvested in the normal manner via centrifugation 8000 rpm and washed twice with PBS  
592 prior to subculture on solid agar. Inoculum for larva infection ( $10^8$  cells/mL) were prepared  
593 in PBS using a Nexelom cell counter; 10 uL ( $10^6$  cells) were injected into the larvae.  
594 Inoculum densities were checked through serial dilution and culture.

595

## 596 **RNAseq**

597 Three replicates of each strain were cultured in YPD broth for 96 hours at 30°C to determine  
598 log phase for RNA extraction. An inoculum of  $10^6$  cells was grown in 7.5 mL of YPD broth by  
599 agitating (200 rpm). At interval time point post-inoculation (0, 6, 20, 24, 30, 44, 54, 68, 72  
600 and 96 hours), an aliquot of 50  $\mu$ L was taken for quantification by plating in Sabouraud agar  
601 plates. These plates were exposed to incubation at 30°C for 48 hours. Growth curves were  
602 plotted using ggplot package and R version 3.4.0 software (R Foundation for Statistical  
603 Computing, Vienna, Austria). Growth rates were determined using the formula growth  
604 rate= $(\log_{10}N_t - \log_{10}N_0) * 2.303 / (t - t_0)$ , where N indicates cell concentration at a particular time  
605 point; and t indicates the time point).

606 For transcriptional experiments, single colonies of each isolate of interest were revived from  
607 beads (Microbank, UK) stored at -80°C. Revived isolates (approximately  $10^6$  cells, counted  
608 using a Cellometer) were grown in 7.5 ml of YPD broth by agitating for 18 hours at 30°C to  
609 reach mid-log phase. RNA was harvested using the RiboPure™-Yeast RNA Isolation Kit  
610 (Ambion, USA) according to the manufacturer's instructions. Extracted RNA samples were  
611 subjected to quality control using an Agilent 2100 Bioanalyzer (Agilent, USA). The integrity  
612 of total RNA was estimated using the RIN (RNA Integrity Number), which ranges from 1 to  
613 10, with 1 being the most degraded. Samples with RIN greater than 7 qualified for RNA-Seq.  
614 6 biological replicates were prepared of every experimental condition. RNA was eluted in  
615 isopropanol and shipped at room temperature to Macrogen (Seoul, Korea) for library  
616 preparation and sequencing.

617 Paired-end RNA-Seq libraries were constructed using the TruSeq stranded mRNA  
618 preparation kit (Illumina, USA). Resulting cDNAs were ligated with sequencing adaptors and

619 sequenced using the Illumina HiSeq 2000 platform, generating ~11.2 million reads of 150 bp  
620 per sample, resulting in an estimated 177-fold coverage.

621

## 622 **RNA sequencing analysis**

623 Raw reads were checked for quality using FastQC  
624 (<https://www.bioinformatics.babraham.ac.uk/projects/fastqc/>). Adapters were removed  
625 using scythe (<https://github.com/vsbuffalo/scythe>). The resulting reads were then further  
626 checked based on Phred score and read length in order to trim low quality regions using  
627 Trimmomatic (<http://www.usadellab.org/cms/?page=trimmomatic>). Sequenced reads were  
628 aligned with the *C. neoformans* var. *grubii* H99 reference genome using HISAT2  
629 (<https://ccb.jhu.edu/software/hisat2/index.shtml>). SAM (Sequences Alignment Map) files,  
630 output of read alignment, were converted to BAM (Binary Alignment Map) files using  
631 SAMtools (<http://www.htslib.org>). Finally featureCounts was used to count reads assigned  
632 to genomic features (genes, exons, chromosome locations) on the reference genome<sup>38</sup>. The  
633 output table of raw counts per gene for each sample was imported for gene expression  
634 analysis using DESeq<sup>39</sup>. Library size differences were normalized internally<sup>40</sup>.

635

## 636 **Metagenomic analysis**

637 Taxonomer, a metagenomics-based pathogen detection tool, was used to profile unmapped  
638 mRNA expression reads and unmapped DNA from (previous) genome sequencing from the  
639 Cryptococcus isolates. A web-based interface was used to visualize summary of taxonomic  
640 composition and read abundance (available at <http://taxonomer.com>).

641

642 **Statistical data analysis**

643 Kaplan-Meyer survival curves were plotted using ggplot2 and survminer package (R version  
644 3.4.2). The Log-rank test was used to compare differences in survival. Hazard Ratios were  
645 estimated using the Cox proportional-hazards model. The Wilcoxon rank sum test was used  
646 to compare fungal burdens between isolates. Capsule size was compared using the Kruskal-  
647 Wallis test with P values adjusted for multiple comparisons with the Benjamini-Hochberg  
648 method.

649

650 **List of Figures**

651

652 **1. Figure 1**

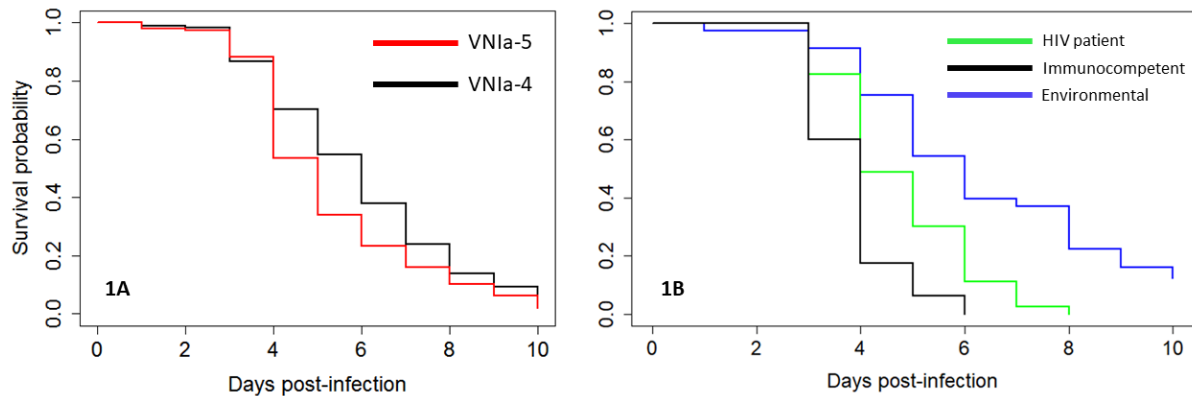

653

654

655 **Figure 1A: Survival curves of *Galleria mellonella* infected with human cerebrospinal fluid derived**  
656 **isolates of *Cryptococcus neoformans* of lineage VNla-5 (derived from immunocompetent patients)**  
657 **or lineage VNla-4 (from HIV infected patients). N = 600 (20 isolates of each lineage, 15 larvae**  
658 **infected with each isolate, Hazard Ratio (95% Confidence interval): HR 1.4, 95CI 1.2,1.6; P<0.001**  
659 **VNla-5 versus VNla-4).**

660 **Figure 1B: Survival curves of *G. mellonella* infected with *C. neoformans* lineage VNla-5 isolates**  
661 **derived from immunocompetent patients (black line), HIV patients (green line), or the**  
662 **environment (blue line). 2 isolates of each source, 40 larvae per isolate. Hazard ratios and 95%CI for**  
663 **death: HIV derived vs environmental: 2.6, 95CI 1.8, 3.7; P< 0.001; immunocompetent derived versus**  
664 **environmental: 5.7; 95CI 3.9, 8.4; P< 0.001; Immunocompetent versus HIV derived: 1.7; 95CI 1.3 –**  
665 **2.4, P<0.001. N=80 per arm.**

666

667

668

669

670

671 **2. Figure 2**

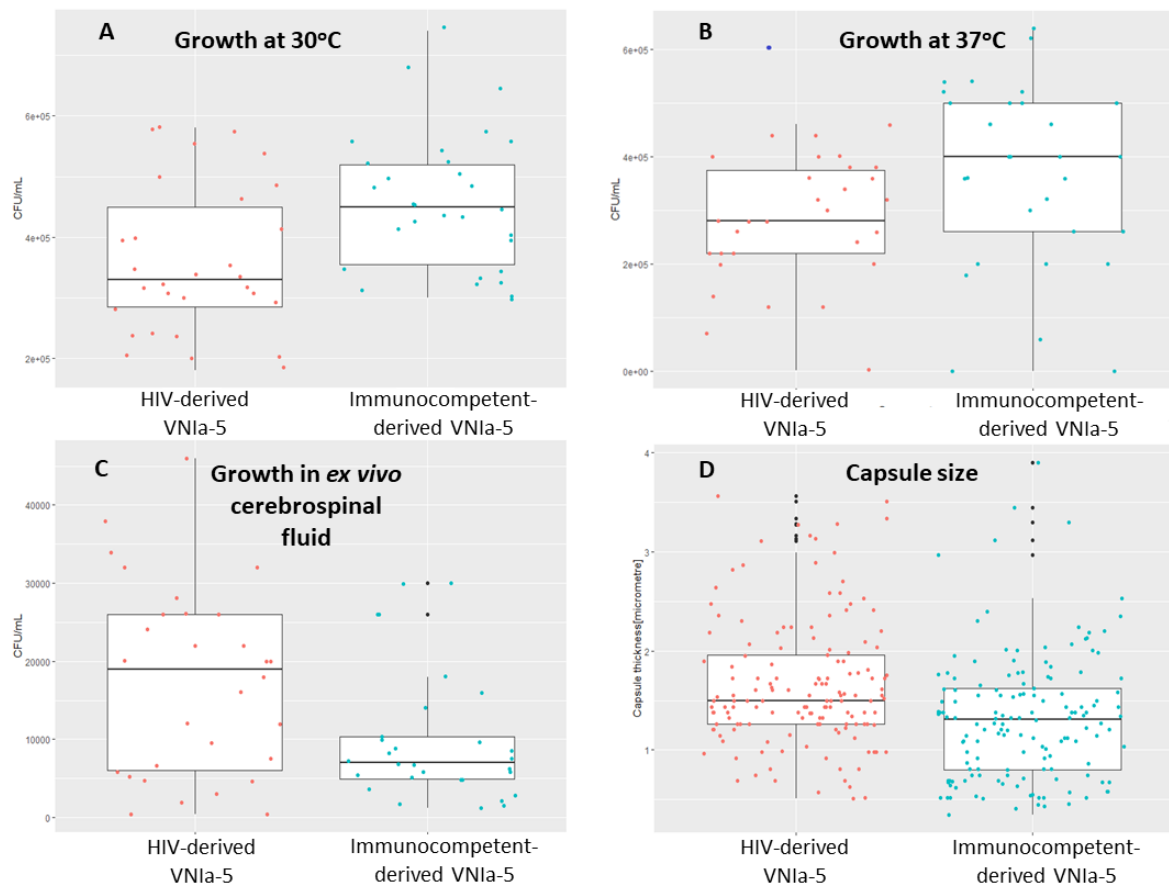

672

673 **Figure 2: Comparative growth rates of VN1a-5 isolates in YNB broth at 30°C (panel A), 37°C (Panel**

674 **B) an in *ex vivo* cerebrospinal fluid (C), and differences in capsule size (D) according to source – HIV**

675 **infected patients or immunocompetent patients. There was statistically significant greater growth**

676 **of isolates derived from immunocompetent patients at both temperatures (P=0.004 and P=0.002 for**

677 **30°C and 37°C respectively). There was reduced growth at 37°C for both sets of isolates, but this was**

678 **only statistically significant for those derived from HIV infected patients. In contrast, isolates derived**

679 **from immunocompetent patients appeared to have significantly impaired growth in *ex vivo* CSF**

680 **compared with isolates from HIV infected patients (P=0.02). (Note that the Y-axis scales are not the**

681 **same in each panel). For all experiments N=15 isolates of each type, with 2 biological replicates.**

682

683 **3. Figure 3**

684

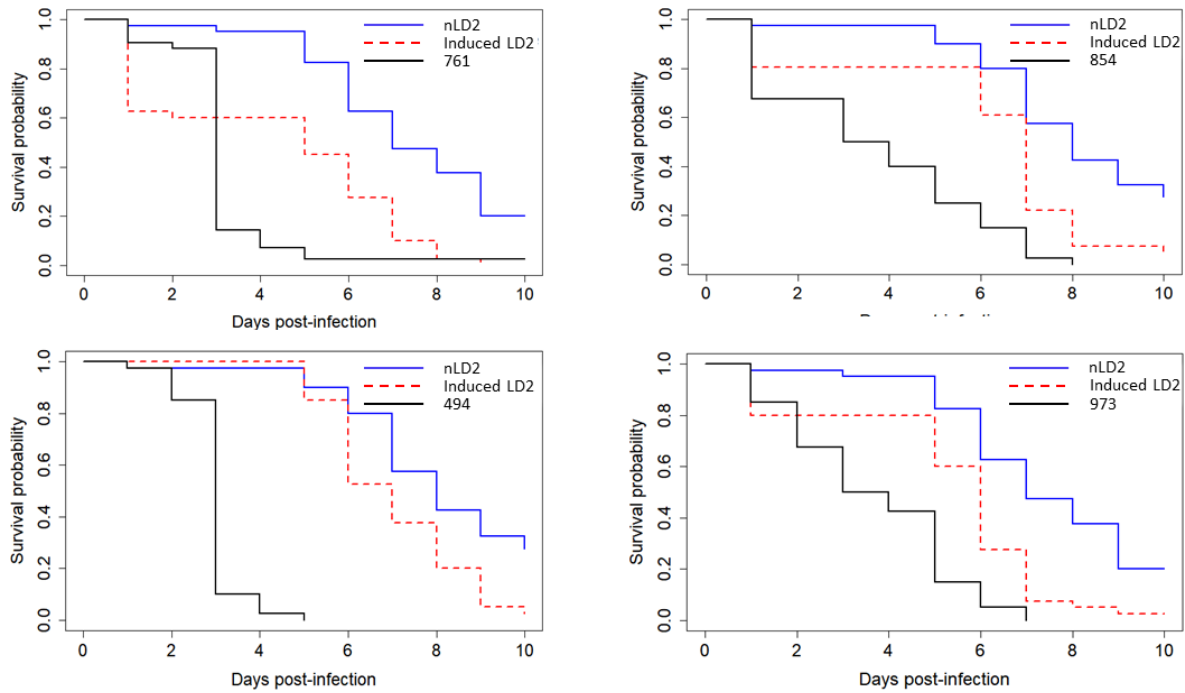

685

686

687 **Figure 3 : Survival curves for *G. mellonella* infected with 4 human isolates of *C. neoformans* lineage**

688 **VNIa-5 derived from HIV uninfected patients (BMD761, BMD854, BMD973 and BMD494), and**

689 **naïve environmental strain (nLD2) and nLD2 following growth in sterile culture filtrate from each**

690 **of the human derived isolates (induced LD2). Hazard ratios of the risk of death, 95%CI and P values**

691 **for iLD2 versus nLD2 infections for each experiment are: HR 2.9, 95CI 1.8, 4.8 P<0.001; HR 2.5, 95CI**

692 **1.5, 4.0 P<0.001; HR 2.7, 95CI 1.7, 4.4 P<0.001 and HR 2.2, 95CI 1.4,3.6 P=0.001 respectively.**

693



694 **4. Figure 4**

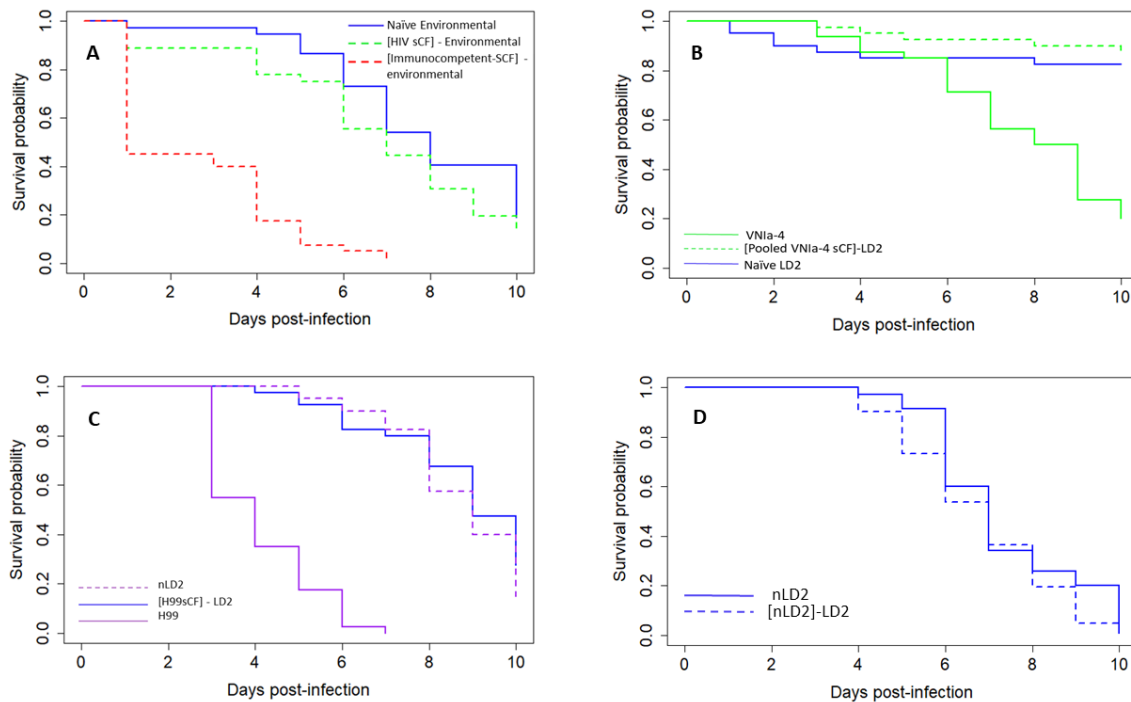

695 **Figure 4: Survival curves of *Galleria* infected with naïve environmental isolate, or that environmental isolate following**  
 696 **growth in media supplemented with sterile culture filtrate (sCF) of different sources, or the source of sCF. The square**  
 697 **brackets refer to the source of the sCF.**  
 698 **Figure 4A: Survival curves for *G. mellonella* infected with environmental isolates of *C. neoformans* lineage VN1a-5 (naïve**  
 699 **environmental, blue line), and infected with the same environmental isolates following their growth in media**  
 700 **supplemented with pooled sterile culture filtrate from either VN1a-5 lineage isolates derived from HIV infected patients**  
 701 **([HIV-sCF], green dashed line) or from immunocompetent patients ([Immunocompetent-sCF], red dashed line). There is**  
 702 **no significant increase in the hazard of death following infection with environmental isolates grown with sCF from HIV**  
 703 **associated VN1a-5 isolates (HR 1.4 (95CI 0.8-2.3), P=0.2). Growth in media supplemented with sterile culture filtrate from**  
 704 **isolates from immunocompetent patients is associated with a significant increase in the hazard of death (HR 10.0; 95CI 5.6-**  
 705 **17.9) P< 0.001 sCF-immunocompetent vs naïve.**  
 706 **Figure 4B: Growth of naïve environmental strain nLD2 in media supplemented with sterile culture filtrate from HIV**  
 707 **derived VN1a-4 lineage isolates does not result in increased virulence in the *Galleria* model. The naïve LD2 strain was**  
 708 **grown in media supplemented with pooled sterile culture filtrate from isolates BK80 or BK224 (VN1a-4 lineage strains**  
 709 **derived from the cerebrospinal fluid of HIV infected patients). Infection with the LD2 environmental isolate grown in sCF**  
 710 **from isolates of the VN1a-4 lineage did not alter the hazard of death compared with infection with LD2 (HR 0.6; 95CI 0.2,**  
 711 **2.0, P=0.5.**  
 712 **Figure 4C: Growth of naïve environmental strain nLD2 in media supplemented with sterile culture filtrate from the**  
 713 ***Cryptococcus neoformans* H99 type strain does not result in increased virulence in the *Galleria* model. H99 was**  
 714 **significantly more virulent than naïve DL2 (HR 28.7 (14-60.4) and P<0.001 for H99 vs LD2 ) but there was no change in the**  
 715 **hazard of death for *Galleria* between infection with either the naïve or H99 induced environmental isolate HR 1.3 (0.8-2.2)**  
 716 **and P=0.25 for iLD2 vs nLD2 N = 40 larvae per arm.**  
 717 **Figure 4D. The virulence of the LD2 environmental isolate is not increased by growth in media supplemented with sterile**  
 718 **culture filtrate derived from previous culture of its naïve state (HR 1.4, 95% CI 0.9-2.2, P=0.2).**  
 719

720 **5. Figure 5**  
721

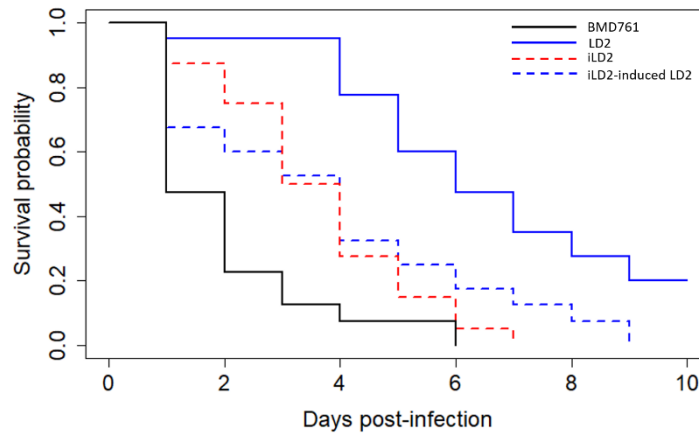

722

723

724 **Figure 5: Survival curves for *Galleria* infected with one of 4 VNIa-5 isolates:** BMD761: isolate from  
725 immunocompetent patient; LD2: 'naïve' environmental isolate; induced LD2: naïve LD2 isolate that  
726 has been grown with sterile culture filtrate (sCF) from BMD761 (HR 8.2 (4.9-13.8),  $P < 0.001$  vs LD2);  
727 iLD2-induced LD2: naïve LD2 isolate grown with sCF from iLD2 (HR 2.8 (1.7-4.4),  $P < 0.001$  vs LD2).

728 N=40 larvae per arm

729

730

731 **6. Figure 6**

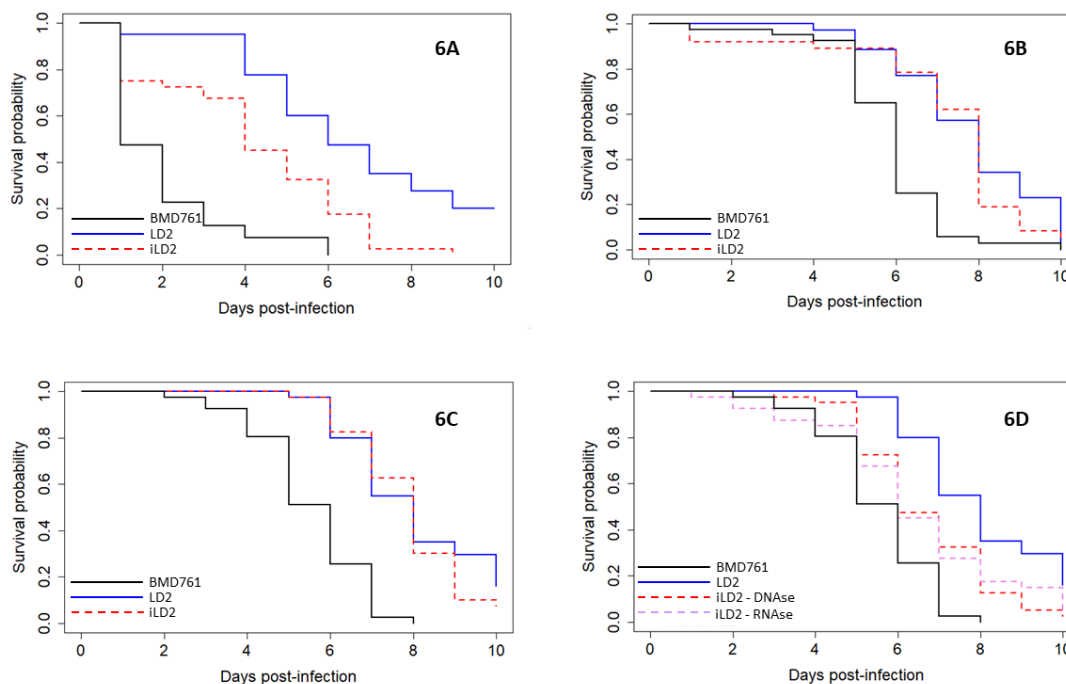

732

733 **Figure 6: The effects of treating sterile culture filtrate from highly virulent strain BMD761 with**  
734 **either freezing, boiling, protease or nuclease on its ability to induce increased virulence in the**  
735 **naïve environmental strain LD2.** Each figure shows survival curves for *Galleria* infected with  
736 different *C. neoformans* isolates. BMD761 is the high virulence VN1a-5 lineage isolate derived from  
737 an HIV uninfected patient, LD2 is a low virulence VN1a-5 lineage isolate derived from the  
738 environment, and induced LD2 is the naïve environmental LD2 isolate following growth in media  
739 supplemented with sterile culture filtrate from BMD761.

740 **Figure 6A: The inducing effect of sterile culture filtrate is not affected by freezing at -20C.**

741 HR 2.7 95%CI 1.7, 4.5 P<0.001

742 **Figure 6B. Boiling abolishes the induction effect of sterile culture filtrate.**

743 HR1.3 95%CI 0.8, 2.01, P=0.3.

744 **Figure 6C: The inducing effect of sterile culture filtrate is abolished by treatment with proteinase.**

745 HR1.2, 95CI 0.8, 2.0, P=0.36

746 **Figure 6D. Treatment with DNase or RNase has no effect on the induction effect of sterile culture**  
747 **filtrate.** DNase HR 2.1, 95CI 1.3, 3.4, P=0.002; RNase HR 2.0, 95CI 1.2, 3.4, P=0.004.

748 N = 30 *Galleria* per arm for all experiments.

749

750

751

752 **7. Figure 7**

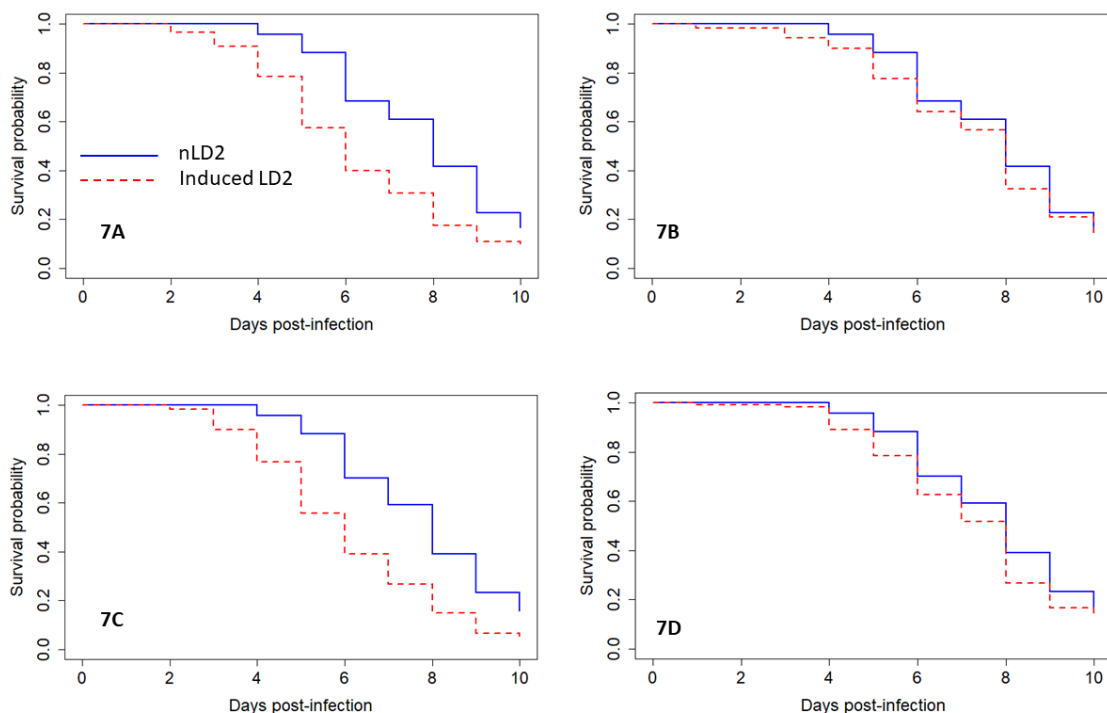

753 **Figure 7: The effect of ultracentrifugation of sterile culture filtrate on induction of virulence in naïve**  
754 **environmental isolate nLD2.**

755 Sterile culture filtrate, derived either from highly virulent isolate BMD761, or from LD2 strain following  
756 virulence induction with sterile culture filtrate from BMD761, underwent an extracellular vesicle (EV)  
757 isolation protocol to produce a putatively EV containing pellet, and an EV-free supernatant. These fractions  
758 were then added to broth culture of naïve LD2 isolate, and the relative virulence of naïve LD2 was compared  
759 with subsequent 'induced LD2' (iLD2). Experiments were done in triplicate, N=80 *Galleria* per arm.  
760 Summated data shown.

761 **Figure 7A: Growth of LD2 in media supplemented with ultracentrifugation pellet derived from BMD761**  
762 **sterile culture filtrate (sCF).** Induction of increased virulence is seen, HR 1.8, 95CI 1.4, 2.4; P<0.001.

763 **Figure 7B: Growth of LD2 in media supplemented with ultracentrifugation supernatant derived from**  
764 **BMD761 sCF.** No induction of virulence in LD2 is seen, HR 1.2, 95CI 0.8, 1.5; P=0.3.

765 **Figure 7C: Growth of LD2 in media supplemented with ultracentrifugation pellet derived from sCF from**  
766 **LD2 that has previously been induced with BMD761 sCF.** Induction of increased virulence is seen, HR 2.1,  
767 95CI 1.6, 2.7; P<0.001.

768 **Figure 7D: Growth of LD2 in media supplemented with ultracentrifugation supernatant derived from sCF**  
769 **from LD2 that has previously been induced with BMD761.** No induction of increased virulence is seen, HR  
770 1.2, 95CI 0.9, 1.6; P=0.1.

771 In all panels the solid blue line represents *Galleria* infected with naïve LD2 (nLD2) and the red dashed line  
772 represents *Galleria* infected with the 'induced' LD2 (iLD2), i.e. the environmental isolate following growth in  
773 media supplemented with either pellet or supernatant.

774 **8. Figure 8**

775

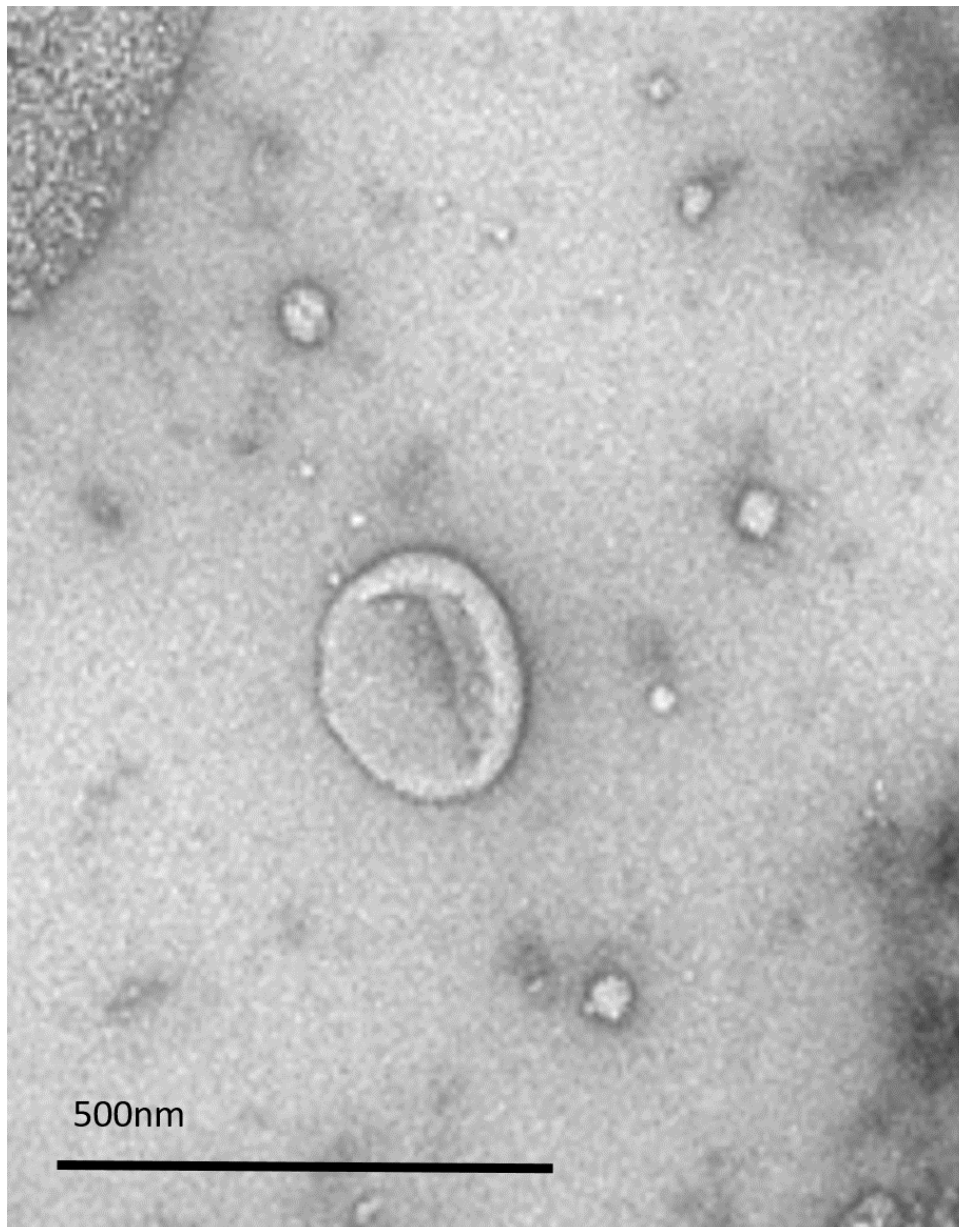

776

777

778

779

**Figure 8: Transmission electron micrograph showing example of extracellular vesicle in ultracentrifugation pellet of BMD761.**

780

781

782 **Figure 9**

783

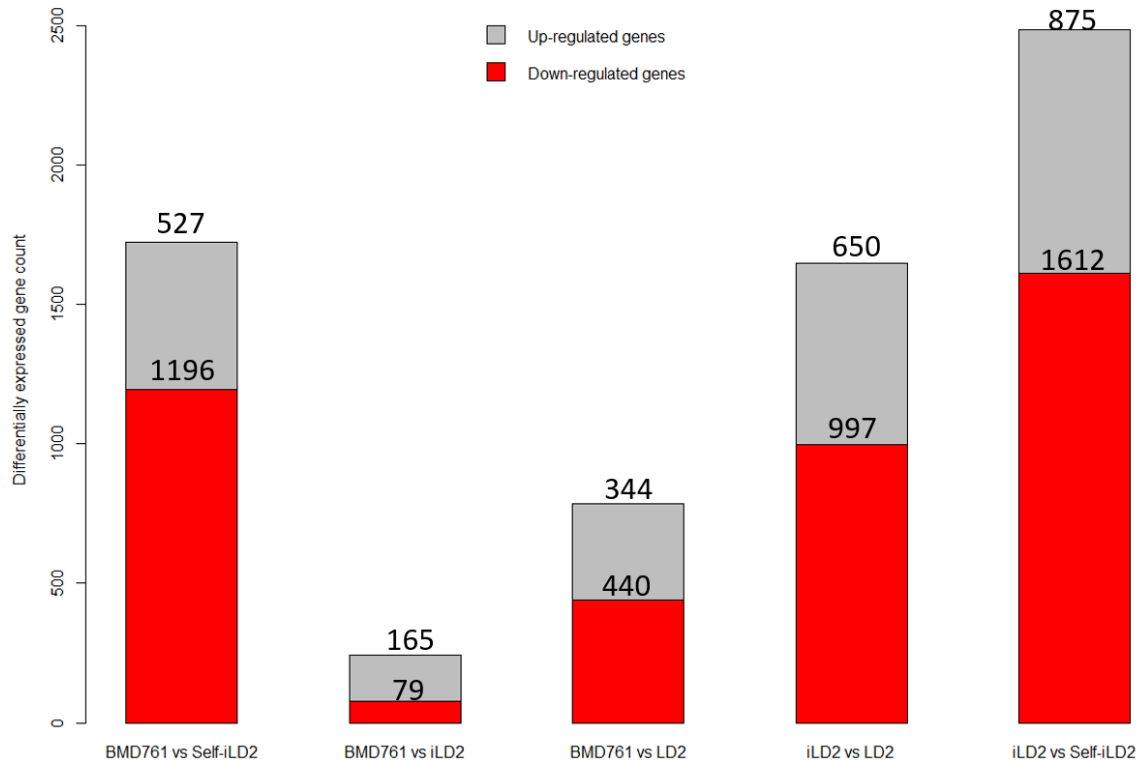

784 **Figure 9: The number of differentially expressed genes between different samples**

785 **(outliers removed).** Genes were counted as differentially expressed if they had a  
786 Benjamani-Hochberg adjusted P-value of  $<0.05$ , and  $\log_2$  fold change  $\geq 1$  and  $\leq -1$ .

787

788

789

790

791 **References**

- 792 1. Hagen F, Khayhan K, Theelen B, Kolecka A, Polacheck I, Sionov E, Falk R, Parnmen S,  
793 Lumbsch HT, Boekhout T. Recognition of seven species in the *Cryptococcus*  
794 *gattii*/*Cryptococcus neoformans* species complex. *Fungal Genet Biol.* 2015;78:16-48.
- 795 2. Casadevall A, Perfect JR. *Cryptococcus neoformans*. 1 ed. Washington: American  
796 Society for Microbiology Press; 1998.
- 797 3. Bartlett KH, Kidd SE, Kronstad JW. The Emergence of *Cryptococcus gattii* in British  
798 Columbia and the Pacific Northwest. *Curr Infect Dis Rep.* 2008;10(1):58-65.
- 799 4. Rajasingham R, Smith RM, Park BJ, Jarvis JN, Govender NP, Chiller TM, Denning DW,  
800 Loyse A, Boulware DR. Global burden of disease of HIV-associated cryptococcal  
801 meningitis: an updated analysis. *Lancet Infect Dis.* 2017;17(8):873-881.
- 802 5. Ashton PM, Thanh LT, Trieu PH, Van Anh D, Trinh NM, Beardsley J, Kibengo F,  
803 Chierakul W, Dance DAB, Rattanaovong S, Davong V, Hung LQ, Chau NVV, Tung NLN,  
804 Chan AK, Thwaites GE, Laloo DG, Anscombe C, Nhat LTH, Perfect J, Dougan G, Baker  
805 S, Harris S, Day JN. Three phylogenetic groups have driven the recent population  
806 expansion of *Cryptococcus neoformans*. *Nat Commun.* 2019;10(1):2035.
- 807 6. Day JN, Qihui S, Thanh LT, Trieu PH, Van AD, Thu NH, Chau TTH, Lan NPH, Chau NVV,  
808 Ashton PM, Thwaites GE, Boni MF, Wolbers M, Nagarajan N, Tan PBO, Baker S.  
809 Comparative genomics of *Cryptococcus neoformans* var. *grubii* associated with  
810 meningitis in HIV infected and uninfected patients in Vietnam. *PLoS Negl Trop Dis.*  
811 2017;11(6):e0005628.
- 812 7. Thanh LT, Phan TH, Rattanaovong S, Nguyen TM, Duong AV, Dacon C, Hoang TN,  
813 Nguyen LPH, Tran CTH, Davong V, Nguyen CVV, Thwaites GE, Boni MF, Dance D,

- 814 Ashton PM, Day JN. Multilocus sequence typing of *Cryptococcus neoformans* var.  
815 *grubii* from Laos in a regional and global context. *Med Mycol.* 2018.
- 816 8. Chen J, Varma A, Diaz MR, Litvintseva AP, Wollenberg KK, Kwon-Chung KJ.  
817 *Cryptococcus neoformans* strains and infection in apparently immunocompetent  
818 patients, China. *Emerg Infect Dis.* 2008;14(5):755-762.
- 819 9. Chen YC, Chang SC, Shih CC, Hung CC, Luhbd KT, Pan YS, Hsieh WC. Clinical features  
820 and in vitro susceptibilities of two varieties of *Cryptococcus neoformans* in Taiwan.  
821 *Diagn Microbiol Infect Dis.* 2000;36(3):175-183.
- 822 10. Choi YH, Ngamskulrunroj P, Varma A, Sionov E, Hwang SM, Carriconde F, Meyer W,  
823 Litvintseva AP, Lee WG, Shin JH, Kim EC, Lee KW, Choi TY, Lee YS, Kwon-Chung KJ.  
824 Prevalence of the VNlc genotype of *Cryptococcus neoformans* in non-HIV-associated  
825 cryptococcosis in the Republic of Korea. *FEMS Yeast Res.* 2010;10(6):769-778.
- 826 11. Feng X, Yao Z, Ren D, Liao W, Wu J. Genotype and mating type analysis of  
827 *Cryptococcus neoformans* and *Cryptococcus gattii* isolates from China that mainly  
828 originated from non-HIV-infected patients. *FEMS Yeast Res.* 2008.
- 829 12. Chau TT, Mai NH, Phu NH, Nghia HD, Chuong LV, Sinh DX, Duong VA, Diep PT,  
830 Campbell JI, Baker S, Hien TT, Laloo DG, Farrar JJ, Day JN. A prospective descriptive  
831 study of cryptococcal meningitis in HIV uninfected patients in Vietnam - high  
832 prevalence of *Cryptococcus neoformans* var *grubii* in the absence of underlying  
833 disease. *BMC Infect Dis.* 2010;10:199.
- 834 13. Day JN, Hoang TN, Duong AV, Hong CT, Diep PT, Campbell JI, Sieu TP, Hien TT, Bui T,  
835 Boni MF, Laloo DG, Carter D, Baker S, Farrar JJ. Most Cases of Cryptococcal  
836 Meningitis in HIV-Uninfected Patients in Vietnam Are Due to a Distinct Amplified



- 837 Fragment Length Polymorphism-Defined Cluster of *Cryptococcus neoformans* var.  
838 *grubii* VN1. *J Clin Microbiol.* 2011;49(2):658-664.
- 839 14. Bielska E, Sisquella MA, Aldeieg M, Birch C, O'Donoghue EJ, May RC. Pathogen-  
840 derived extracellular vesicles mediate virulence in the fatal human pathogen  
841 *Cryptococcus gattii*. *Nat Commun.* 2018;9(1):1556.
- 842 15. Sayers S, Li L, Ong E, Deng S, Fu G, Lin Y, Yang B, Zhang S, Fa Z, Zhao B, Xiang Z, Li Y,  
843 Zhao XM, Olszewski MA, Chen L, He Y. Victors: a web-based knowledge base of  
844 virulence factors in human and animal pathogens. *Nucleic Acids Res.*  
845 2019;47(D1):D693-D700.
- 846 16. Wolf JM, Rivera J, Casadevall A. Serum albumin disrupts *Cryptococcus neoformans*  
847 and *Bacillus anthracis* extracellular vesicles. *Cell Microbiol.* 2012;14(5):762-773.
- 848 17. Edskes HK, Khamar HJ, Winchester CL, Greenler AJ, Zhou A, McGlinchey RP,  
849 Gorkovskiy A, Wickner RB. Sporadic distribution of prion-forming ability of Sup35p  
850 from yeasts and fungi. *Genetics.* 2014;198(2):605-616.
- 851 18. Jurka J, Kapitonov VV, Pavlicek A, Klonowski P, Kohany O, Walichiewicz J. Repbase  
852 Update, a database of eukaryotic repetitive elements. *Cytogenet Genome Res.*  
853 2005;110(1-4):462-467.
- 854 19. Albuquerque PC, Nakayasu ES, Rodrigues ML, Frases S, Casadevall A, Zancoppe-  
855 Oliveira RM, Almeida IC, Nosanchuk JD. Vesicular transport in *Histoplasma*  
856 *capsulatum*: an effective mechanism for trans-cell wall transfer of proteins and lipids  
857 in ascomycetes. *Cell Microbiol.* 2008;10(8):1695-1710.
- 858 20. Rodrigues ML, Nakayasu ES, Oliveira DL, Nimrichter L, Nosanchuk JD, Almeida IC,  
859 Casadevall A. Extracellular vesicles produced by *Cryptococcus neoformans* contain  
860 protein components associated with virulence. *Eukaryot Cell.* 2008;7(1):58-67.

- 861 21. Rodrigues ML, Nimrichter L, Oliveira DL, Frases S, Miranda K, Zaragoza O, Alvarez M,  
862 Nakouzi A, Feldmesser M, Casadevall A. Vesicular polysaccharide export in  
863 *Cryptococcus neoformans* is a eukaryotic solution to the problem of fungal trans-cell  
864 wall transport. *Eukaryot Cell*. 2007;6(1):48-59.
- 865 22. Rodrigues ML, Nimrichter L, Oliveira DL, Nosanchuk JD, Casadevall A. Vesicular Trans-  
866 Cell Wall Transport in Fungi: A Mechanism for the Delivery of Virulence-Associated  
867 Macromolecules? *Lipid Insights*. 2008;2:27-40.
- 868 23. Rodrigues ML, Casadevall A. A two-way road: novel roles for fungal extracellular  
869 vesicles. *Mol Microbiol*. 2018;110(1):11-15.
- 870 24. Ofir-Birin Y, Regev-Rudzki N. Extracellular vesicles in parasite survival. *Science*.  
871 2019;363(6429):817-818.
- 872 25. Konoshenko MY, Lekchnov EA, Vlassov AV, Laktionov PP. Isolation of Extracellular  
873 Vesicles: General Methodologies and Latest Trends. *Biomed Res Int*.  
874 2018;2018:8545347.
- 875 26. Casadevall A. Amoeba provide insight into the origin of virulence in pathogenic fungi.  
876 *Adv Exp Med Biol*. 2012;710:1-10.
- 877 27. Casadevall A, Fu MS, Guimaraes AJ, Albuquerque P. The 'Amoeboid Predator-Fungal  
878 Animal Virulence' Hypothesis. *J Fungi (Basel)*. 2019;5(1).
- 879 28. Coelho C, Bocca AL, Casadevall A. The tools for virulence of *Cryptococcus*  
880 *neoformans*. *Adv Appl Microbiol*. 2014;87:1-41.
- 881 29. Derengowski Lda S, Paes HC, Albuquerque P, Tavares AH, Fernandes L, Silva-Pereira I,  
882 Casadevall A. The transcriptional response of *Cryptococcus neoformans* to ingestion  
883 by *Acanthamoeba castellanii* and macrophages provides insights into the  
884 evolutionary adaptation to the mammalian host. *Eukaryot Cell*. 2013;12(5):761-774.

- 885 30. Nguyen VTT, Phan HT, Kato M, Nguyen QT, Le Ai KA, Vo SH, Thanh DC, Baggaley RC,  
886 Johnson CC. Community-led HIV testing services including HIV self-testing and  
887 assisted partner notification services in Vietnam: lessons from a pilot study in a  
888 concentrated epidemic setting. *J Int AIDS Soc.* 2019;22 Suppl 3:e25301.
- 889 31. Beardsley J, Wolbers M, Kibengo FM, Ggayi AB, Kamali A, Cuc NT, Binh TQ, Chau NV,  
890 Farrar J, Merson L, Phuong L, Thwaites G, Van Kinh N, Thuy PT, Chierakul W, Siriboon  
891 S, Thiansukhon E, Onsanit S, Supphamongkholchaikul W, Chan AK, Heyderman R,  
892 Mwinjiwa E, van Oosterhout JJ, Imran D, Basri H, Mayxay M, Dance D, Phimmasone  
893 P, Rattanavong S, Laloo DG, Day JN, CryptoDex I. Adjunctive Dexamethasone in HIV-  
894 Associated Cryptococcal Meningitis. *N Engl J Med.* 2016;374(6):542-554.
- 895 32. Day JN, Chau TT, Wolbers M, Mai PP, Dung NT, Mai NH, Phu NH, Nghia HD, Phong  
896 ND, Thai CQ, Thai le H, Chuong LV, Sinh DX, Duong VA, Hoang TN, Diep PT, Campbell  
897 JI, Sieu TP, Baker SG, Chau NV, Hien TT, Laloo DG, Farrar JJ. Combination antifungal  
898 therapy for cryptococcal meningitis. *N Engl J Med.* 2013;368(14):1291-1302.
- 899 33. Lee A, Toffaletti DL, Tenor J, Soderblom EJ, Thompson JW, Moseley MA, Price M,  
900 Perfect JR. Survival defects of *Cryptococcus neoformans* mutants exposed to human  
901 cerebrospinal fluid result in attenuated virulence in an experimental model of  
902 meningitis. *Infect Immun.* 2010;78(10):4213-4225.
- 903 34. Zaragoza O, Casadevall A. Experimental modulation of capsule size in *Cryptococcus*  
904 *neoformans*. *Biol Proced Online.* 2004;6:10-15.
- 905 35. Salas SD, Bennett JE, Kwon-Chung KJ, Perfect JR, Williamson PR. Effect of the laccase  
906 gene CNLAC1, on virulence of *Cryptococcus neoformans*. *J Exp Med.*  
907 1996;184(2):377-386.

- 908 36. Eisenman HC, Mues M, Weber SE, Frases S, Chaskes S, Gerfen G, Casadevall A.  
909 Cryptococcus neoformans laccase catalyses melanin synthesis from both D- and L-  
910 DOPA. *Microbiology*. 2007;153(Pt 12):3954-3962.
- 911 37. Chen SC, Muller M, Zhou JZ, Wright LC, Sorrell TC. Phospholipase activity in  
912 Cryptococcus neoformans: a new virulence factor? *J Infect Dis*. 1997;175(2):414-420.
- 913 38. Liao Y, Smyth GK, Shi W. featureCounts: an efficient general purpose program for  
914 assigning sequence reads to genomic features. *Bioinformatics*. 2014;30(7):923-930.
- 915 39. Love MI, Huber W, Anders S. Moderated estimation of fold change and dispersion  
916 for RNA-seq data with DESeq2. *Genome Biol*. 2014;15(12):550.
- 917 40. Love MI, Anders S, Kim V, Huber W. RNA-Seq workflow: gene-level exploratory  
918 analysis and differential expression. *F1000Res*. 2015;4:1070.
- 919
